# Supplementary material for: Microwave synthesis of MoS2/MoO2@CNT nanocomposites with excellent cycling stability for supercapacitor electrodes
Source: Royal Society of Chemistry journal article supplement (doi:10.1039/c9tc02391g), 2019-01-01
Supplement: c9tc02391g1.pdf [file c9tc02391g1.pdf]

## Microwave synthesis of MoS<sub>2</sub>/MoO<sub>2</sub>@CNT nanocomposites with excellent cycle stability for supercapacitor electrodes

Yunrui Tian<sup>1</sup>, Haishun Du<sup>2</sup>, Miaomiao Zhang<sup>2</sup>, Yayun Zheng<sup>1</sup>, Qingping Guo<sup>1</sup>, Huaiping Zhang<sup>1</sup>, Jujie

Luo<sup>1,\*</sup>, Xinyu Zhang<sup>2,\*</sup>

<sup>1</sup> College of Materials Science and Engineering, Taiyuan University of Technology, Taiyuan 030024, PR China

<sup>2</sup> Department of Chemical Engineering, Auburn University, Auburn, AL 36849, USA

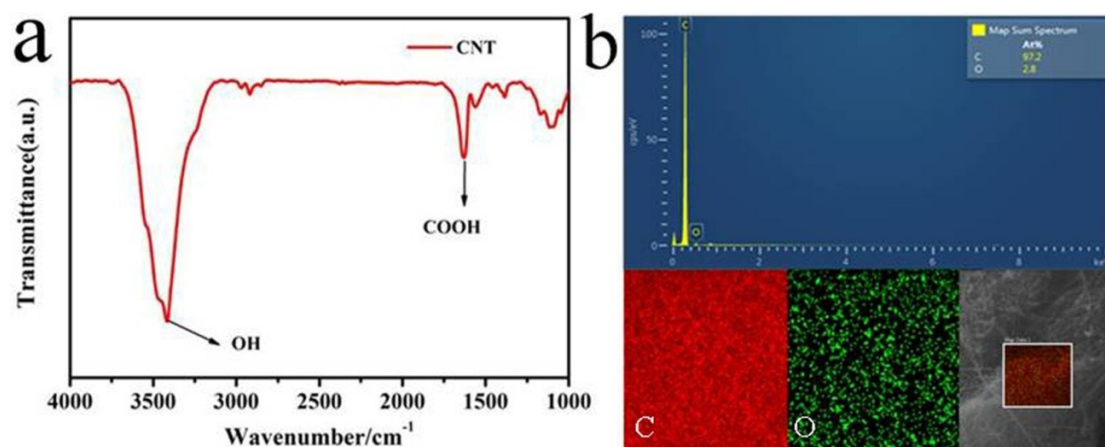

Fig S1. a) The FT-IR spectra of CNT, b) The EDS spectra of CNT.
